# Supplementary material for: NAT10 promotes the progression of clear cell renal cell carcinoma by regulating ac4C acetylation of NFE2L3 and activating AKT/GSK3β signaling pathway
Source: Springer Nature journal article supplement (doi:10.1038/s41419-025-07528-w), 2025-04-02

Supplemental Material-western blot-1

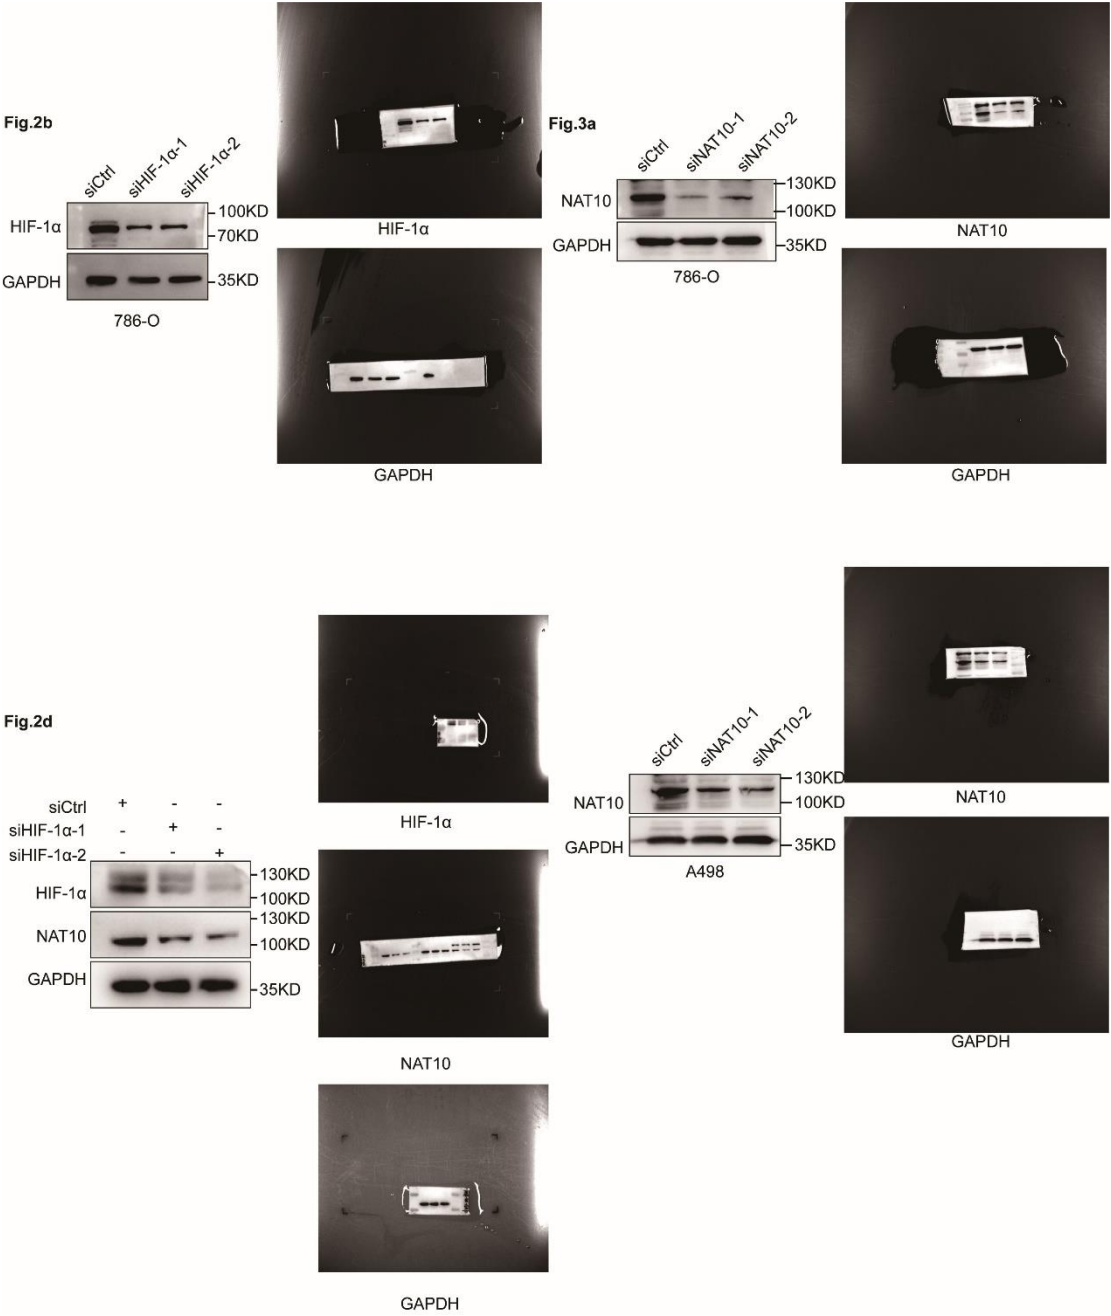

Supplemental Material-western blot-2

**Fig.3j**

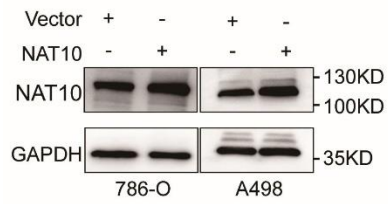

**Fig.4b**

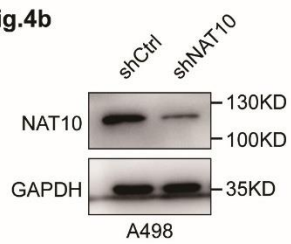

**Fig.5i**

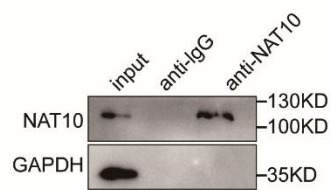

**Fig.5k**

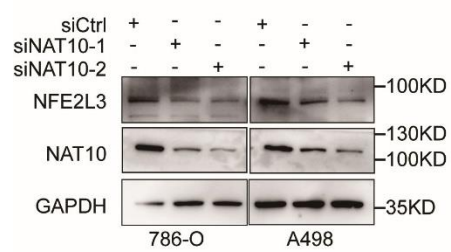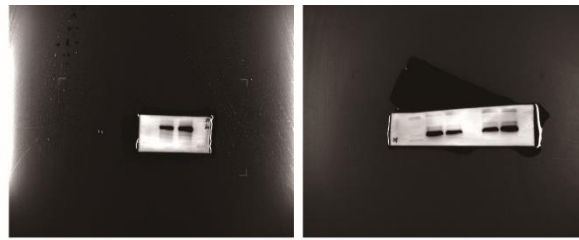

NAT10

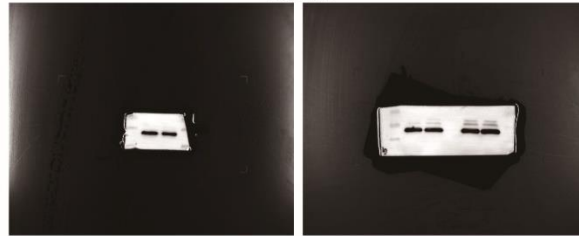

GAPDH

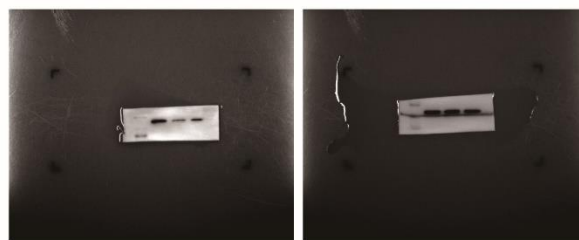

NAT10

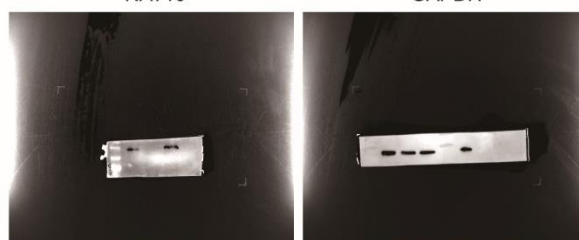

GAPDH

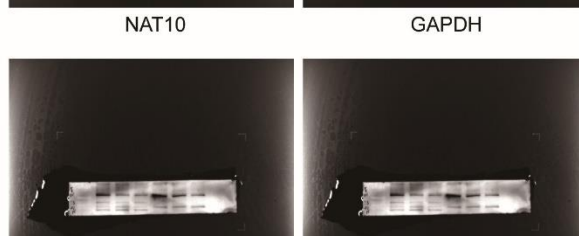

NFE2L3

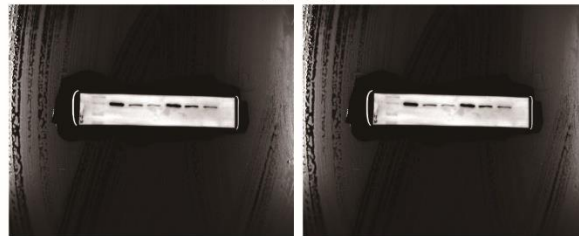

NAT10

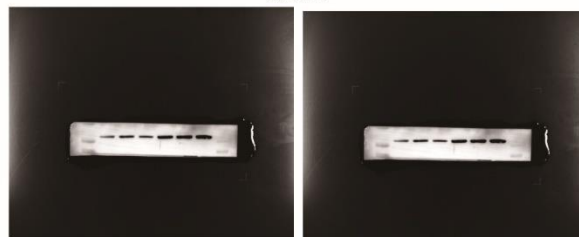

GAPDH

Supplemental Material-western blot-3

Supplemental Material 2 g

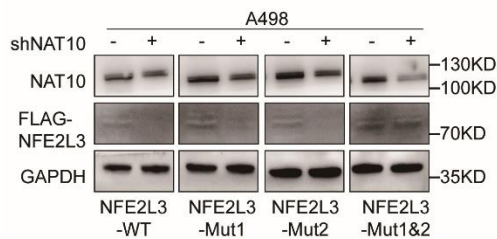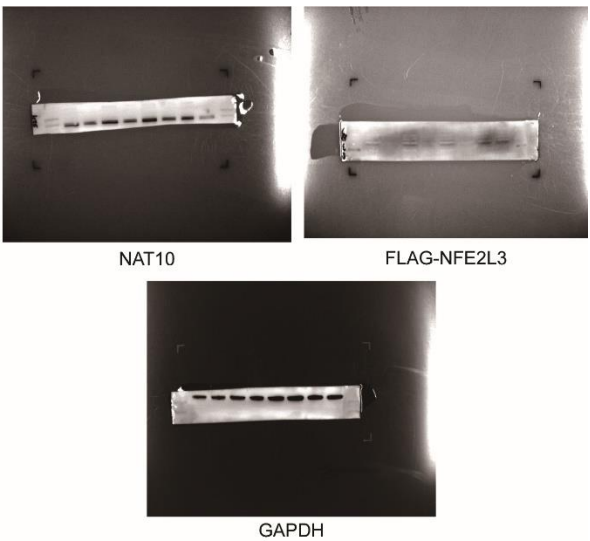

Supplemental Material 2 h

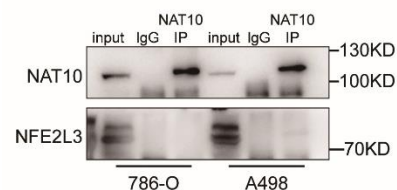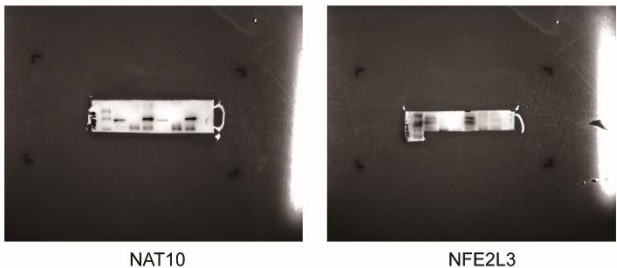

Fig.6d

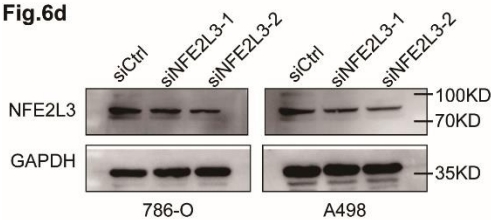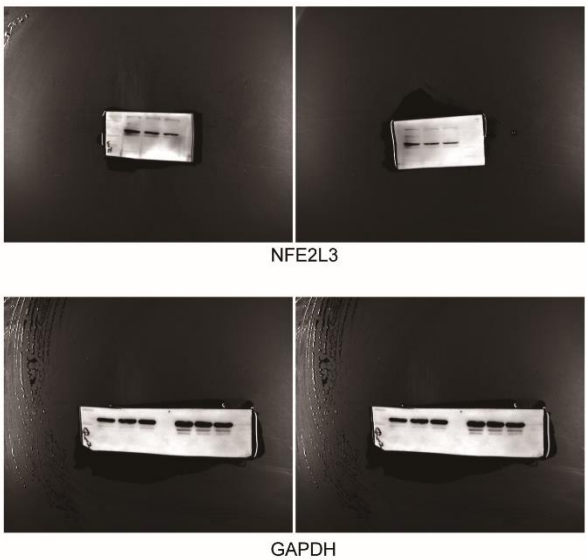

Supplemental Material-western blot-4

Fig.7h

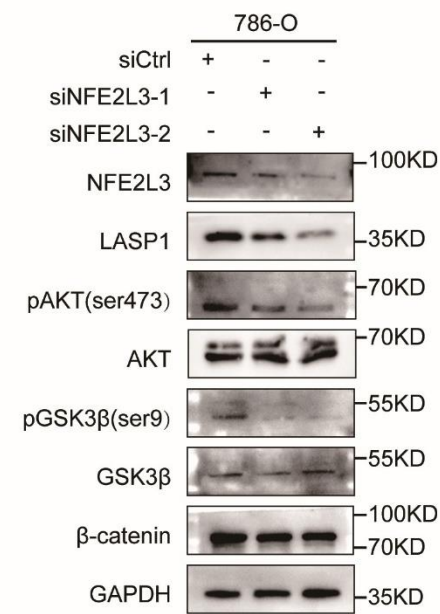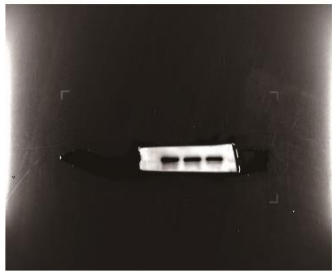

β-catenin

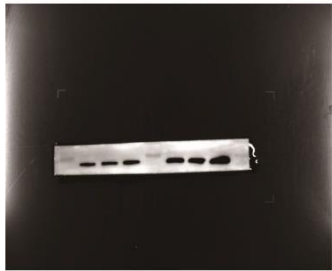

GAPDH

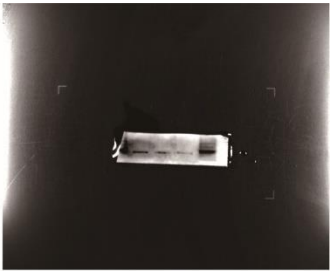

NFE2L3

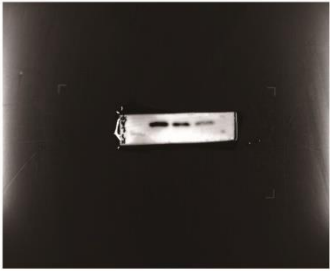

LASP1

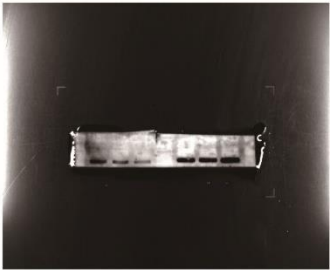

pAKT(ser473)

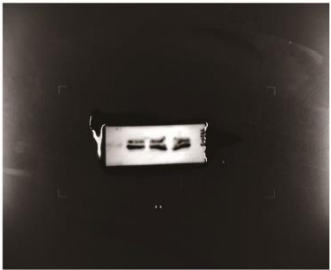

AKT

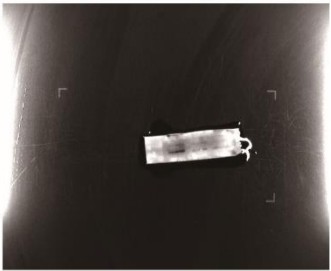

pGSK3β(ser9)

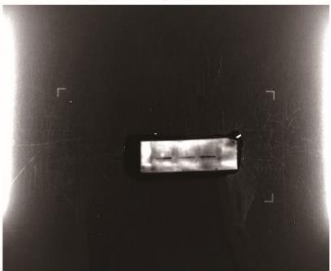

GSK3β

Supplemental Material-western blot-5

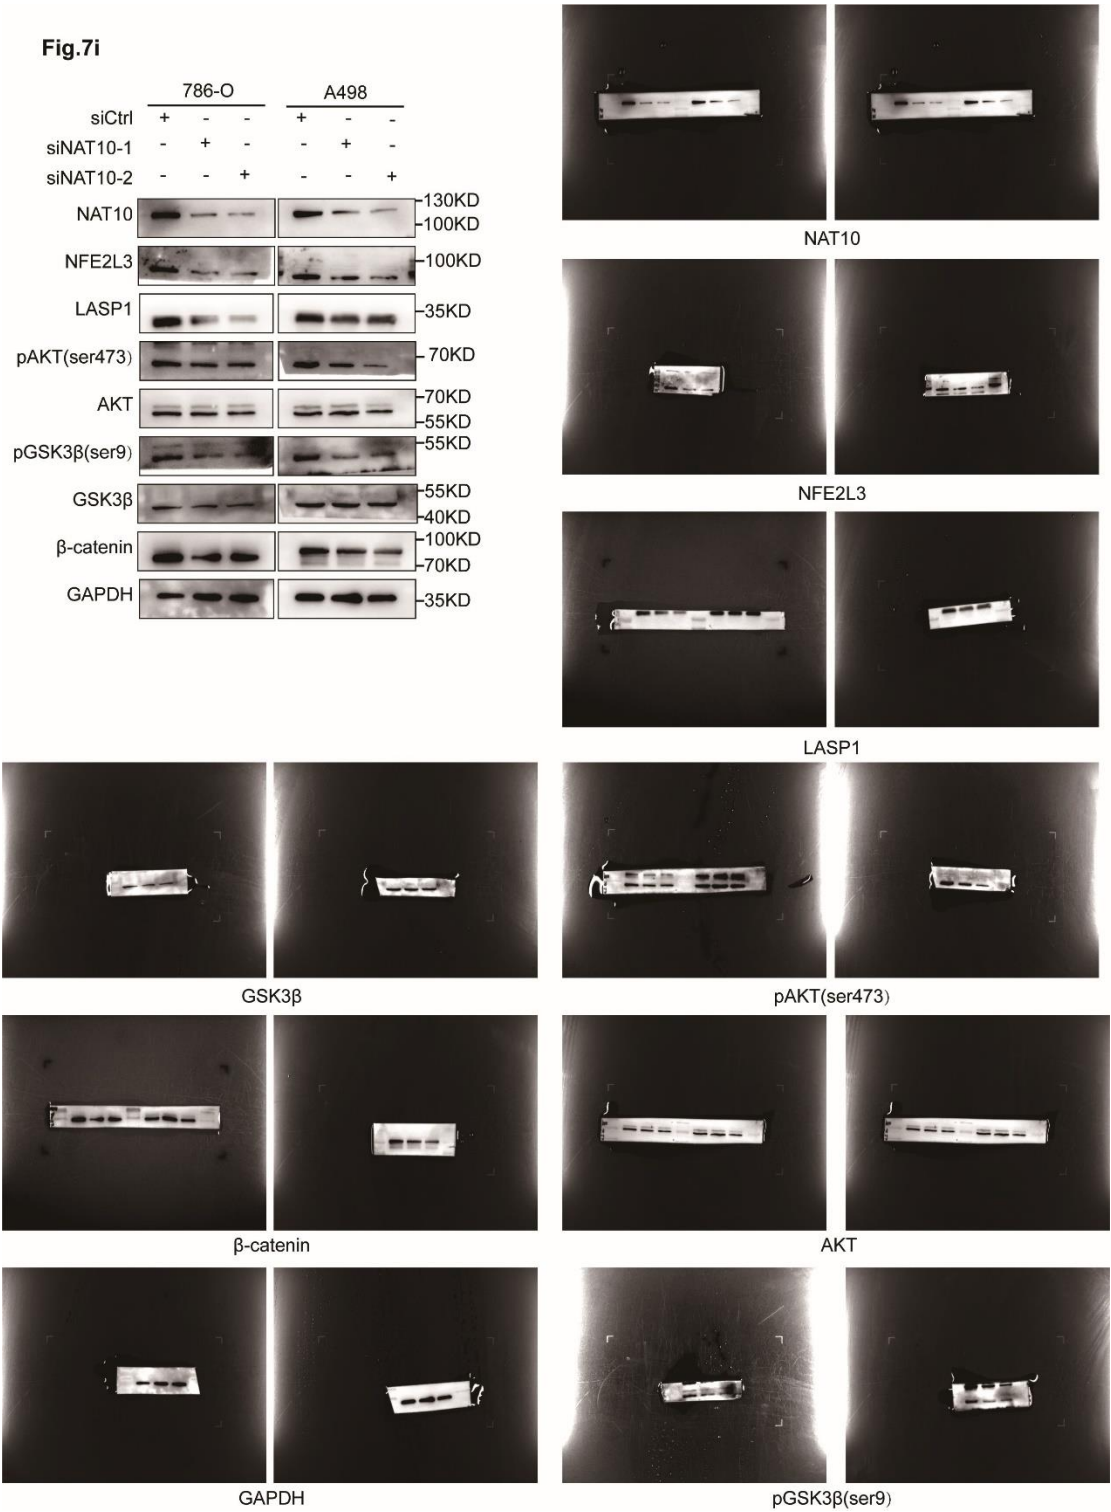

Supplemental Material-western blot-6

Fig.7j

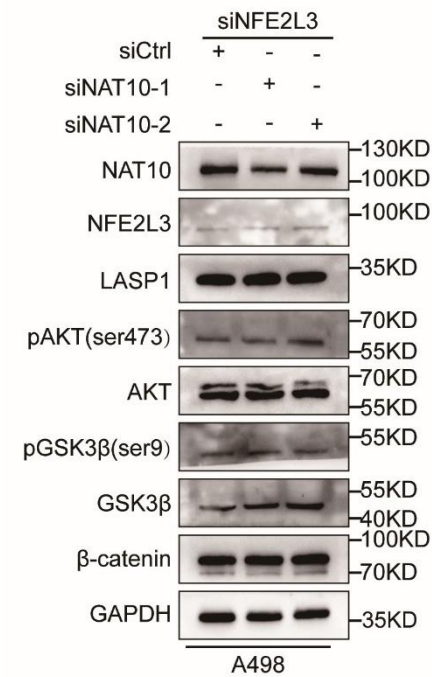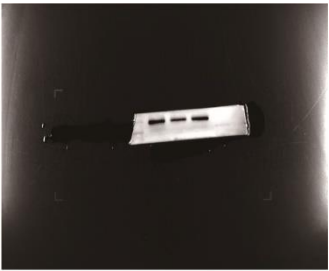

NAT10

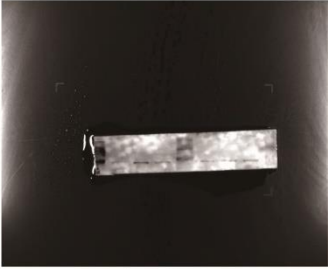

NFE2L3

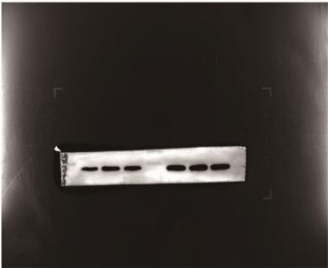

LASP1

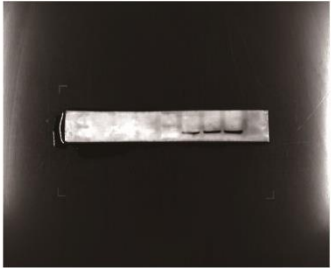

GSK3β

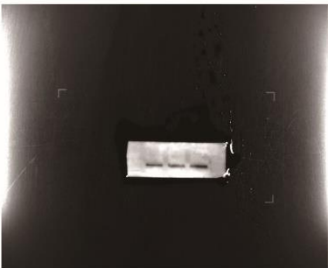

pAKT(ser473)

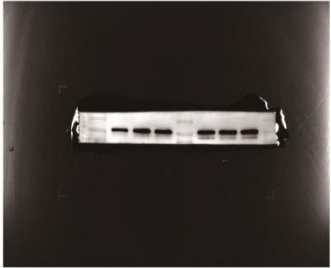

β-catenin

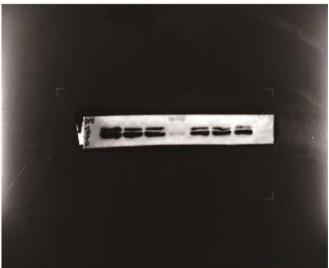

AKT

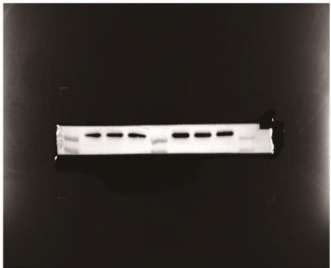

GAPDH

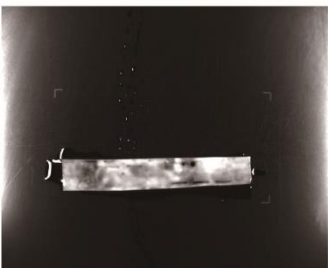

pGSK3β(ser9)



Fig.5o

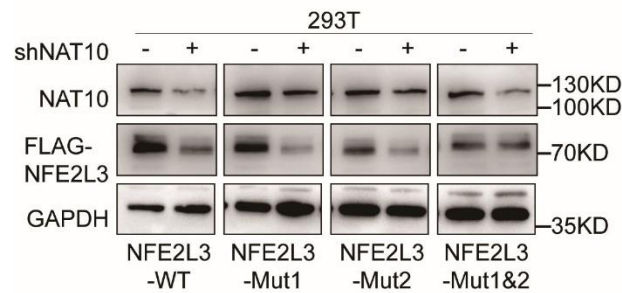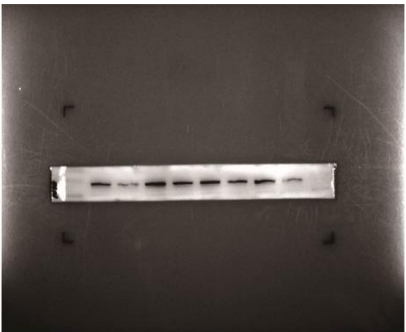

NAT10

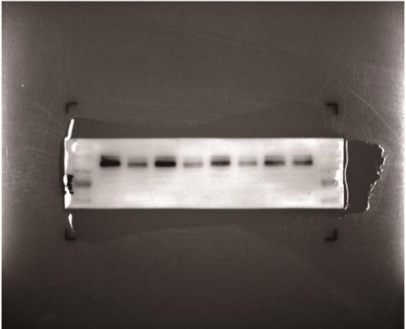

FLAG-NFE2L3

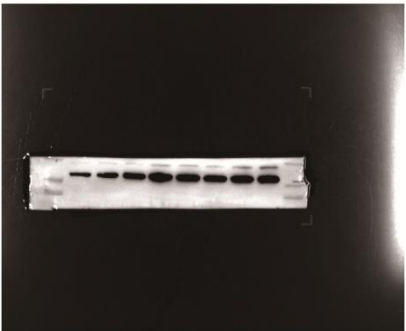

GAPDH

**Fig.S4d**

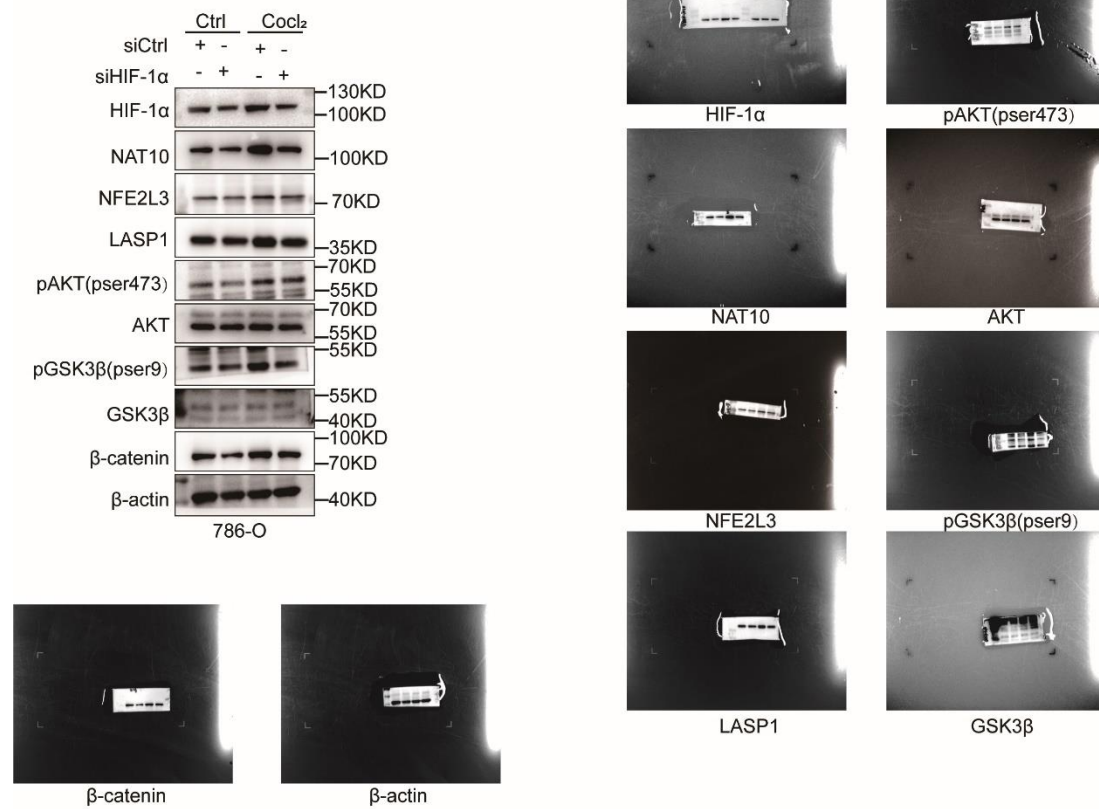

**Fig.S1j**

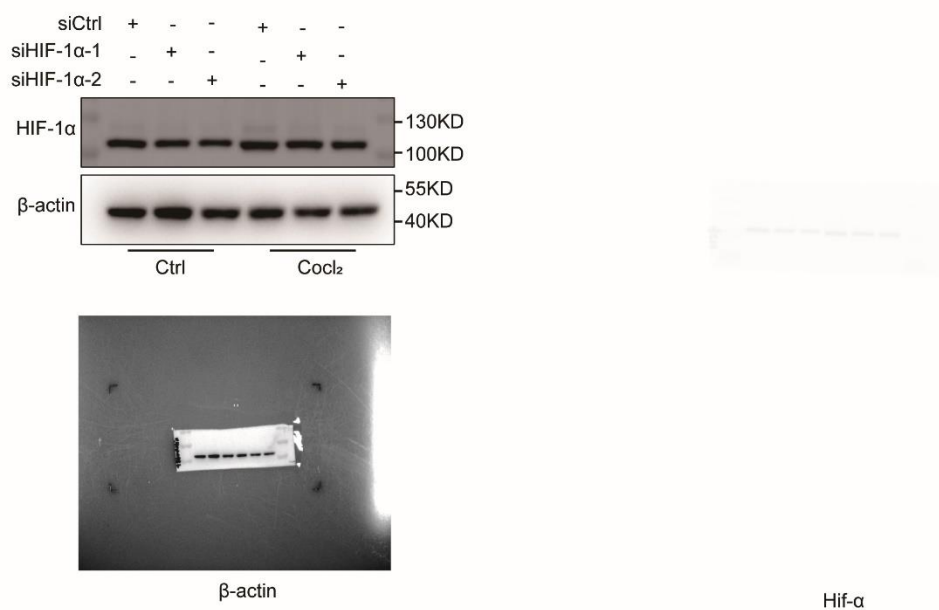



# Supplementary Fig5a

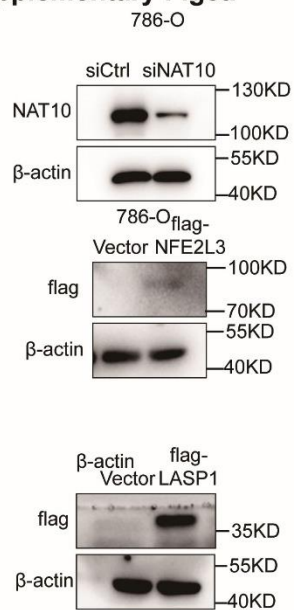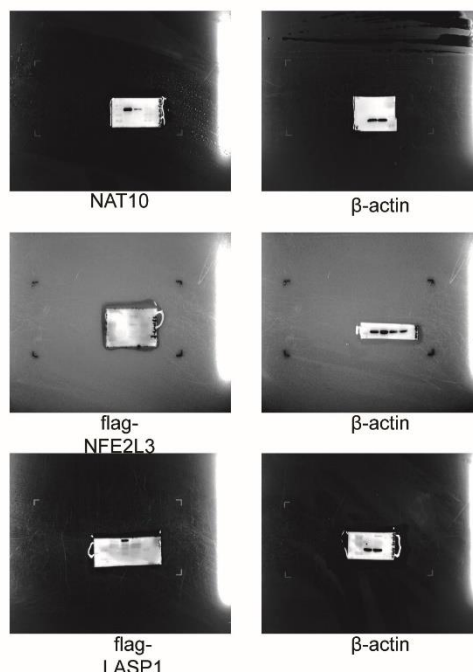

# Supplementary Fig5b

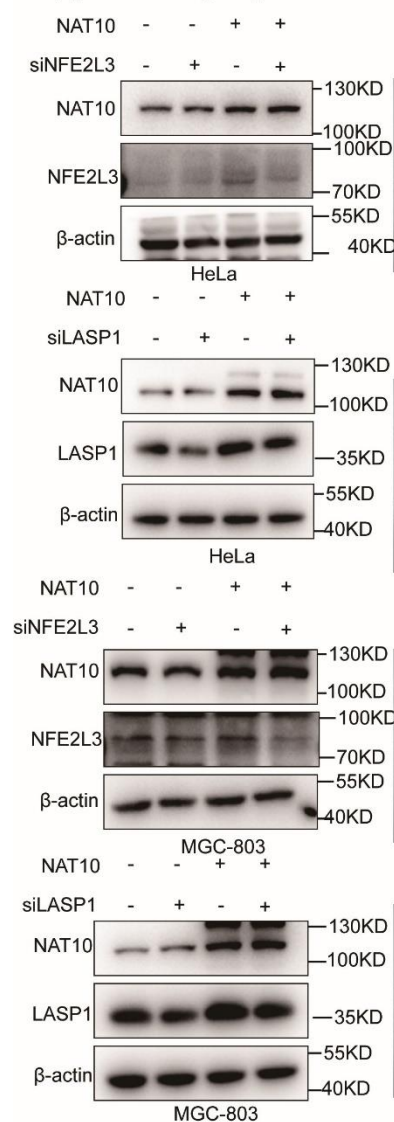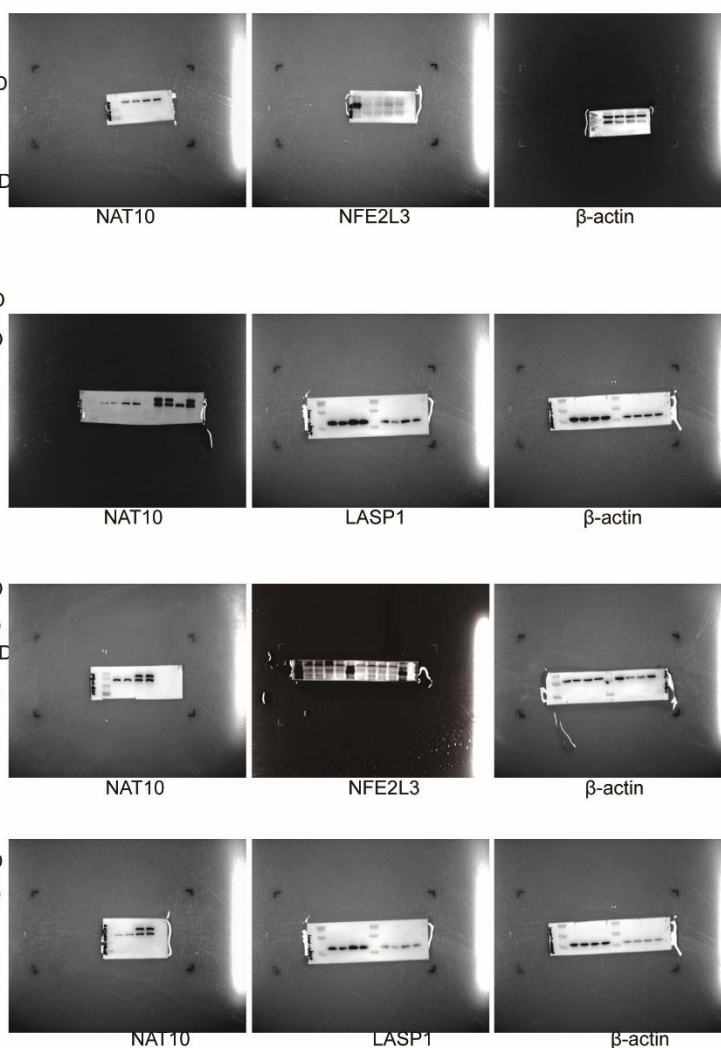

Supplement: MOESM1 [file 41419_2025_7528_MOESM1_ESM.pdf]
